# Supplementary material for: Origin, Maturity Group and Seed Coat Color Influence Carotenoid and Chlorophyll Concentrations in Soybean Seeds
Source: MDPI journal article supplement (doi:10.3390/plants11070848), 2022-03-23
Supplement: s1 [file s1]

**Table S2.** Monthly temperature, precipitation and sunshine readings at the experimental sites in China in 2017 and 2018 cropping seasons

| Sanya, Hainan Province |         |       |          |      |          |       |           |       |          |       |          |      |       |        |
|------------------------|---------|-------|----------|------|----------|-------|-----------|-------|----------|-------|----------|------|-------|--------|
| Month                  | October |       | November |      | December |       | January   |       | February |       | March    |      | Sum   |        |
| Year                   | 2017    | 2018  | 2017     | 2018 | 2017     | 2018  | 2017      | 2018  | 2017     | 2018  | 2017     | 2018 | 2017  | 2018   |
| Max. (°C)              | 29.0    | 28.0  | 28.0     | 24.0 | 25.0     | 22.0  | 24.0      | 23.0  | 24.0     | 24.0  | 27.0     | 34.0 | 157   | 155    |
| Aver. (°C)             | 28.0    | 24.0  | 26.0     | 21.0 | 23.0     | 18.0  | 22.0      | 19.0  | 22.0     | 19.0  | 25.0     | 28.0 | 146   | 129    |
| Min. (°C)              | 25.0    | 21.0  | 23.0     | 20.0 | 20.0     | 16.0  | 19        | 16.0  | 19.0     | 15.0  | 22.0     | 24.0 | 128   | 112    |
| Rainfall (mm)          | 262.7   | 95.4  | 79.3     | 79.8 | 21.8     | 18.6  | 40.1      | 16.2  | 33.6     | 16.0  | 124.9    | 22.3 | 562.4 | 248.3  |
| Sunshine (h)           | 166.5   | 202.5 | 136      | 90.5 | 132.5    | 155.5 | 131       | 124.5 | 138      | 173.5 | 200      | 245  | 904   | 991.5  |
| Changping, Beijing     |         |       |          |      |          |       |           |       |          |       |          |      |       |        |
| Month                  | June    |       | July     |      | August   |       | September |       | October  |       | November |      | Sum   |        |
| Year                   | 2017    | 2018  | 2017     | 2018 | 2017     | 2018  | 2017      | 2018  | 2017     | 2018  | 2017     | 2018 | 2017  | 2018   |
| Max. (°C)              | 30.0    | 33.0  | 37.0     | 33.0 | 36.0     | 32.0  | 32.0      | 26.0  | 20.0     | 21.0  | 11.0     | 14.0 | 166   | 159    |
| Aver. (°C)             | 28.0    | 28.0  | 35.0     | 29.0 | 34.0     | 28.0  | 29.0      | 21.0  | 18.0     | 19.0  | 9.0      | 11.0 | 153   | 136    |
| Min. (°C)              | 23.0    | 22.0  | 31.0     | 25.0 | 30.0     | 24.0  | 24.0      | 17.0  | 15.0     | 15.0  | 6.0      | 8.0  | 129   | 111    |
| Rainfall (mm)          | 67.0    | 35.5  | 69.5     | 127  | 135.8    | 57.2  | 8.2       | 19.0  | 84.4     | 3.7   | 0.0      | 2.7  | 364.9 | 245.1  |
| Sunshine (h)           | 323.5   | 350.5 | 336      | 303  | 314      | 329   | 325       | 316   | 173.5    | 219   | 215      | 207  | 1687  | 1724.5 |

**Table S3.** Analysis of variance (ANOVA) for effect of country of origin, maturity group, and seed color on variability of carotenoid and chlorophyll concentrations in soybean germplasm accessions grown in China for two years

| Sources of variation | Chlorophyll components |               |        | Carotenoid components |            |            |        |
|----------------------|------------------------|---------------|--------|-----------------------|------------|------------|--------|
|                      | Chlorophyll-a          | Chlorophyll-b | Totchl | Lutein                | Zeaxanthin | β-carotene | Totcar |
| Accession            | ***                    | ***           | ***    | ***                   | *          | ***        | ***    |
| Year                 | ***                    | ***           | NS     | ***                   | ***        | NS         | ***    |
| Year×Accession       | NS                     | NS            | NS     | NS                    | NS         | NS         | NS     |
| Country              | *                      | **            | *      | ***                   | NS         | *          | **     |
| Year                 | ***                    | NS            | NS     | ***                   | ***        | NS         | ***    |
| Year × Country       | NS                     | NS            | NS     | NS                    | NS         | NS         | NS     |
| MG                   | NS                     | NS            | ***    | ***                   | NS         | NS         | ***    |
| Year                 | NS                     | ***           | ***    | ***                   | ***        | NS         | ***    |
| Year × MG            | NS                     | NS            | ***    | ***                   | NS         | NS         | ***    |
| Seed color           | ***                    | ***           | ***    | ***                   | ***        | ***        | ***    |
| Year                 | ***                    | ***           | NS     | ***                   | ***        | NS         | ***    |
| Year ×<br>Seed color | NS                     | NS            | NS     | ***                   | ***        | NS         | ***    |

\*, \*\* and \*\*\* represent the significance levels at  $p < 0.05$ , 0.01, and 0.001, respectively; NS, not significant; Totchl, total chlorophyll; Totcar, Total carotenoid; MG, Maturity group.
