# Supplementary material for: Origin, Maturity Group and Seed Coat Color Influence Carotenoid and Chlorophyll Concentrations in Soybean Seeds
Source: MDPI journal article supplement (doi:10.3390/plants11070848), 2022-03-23
Supplement: s1 [file s1]

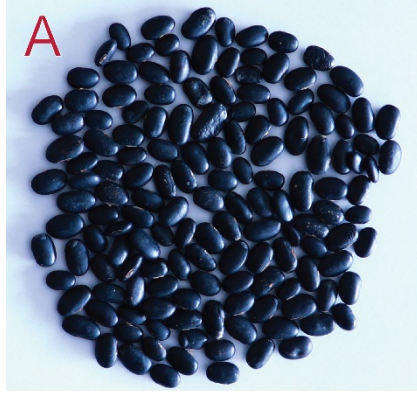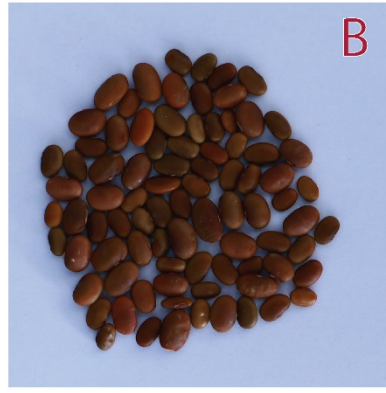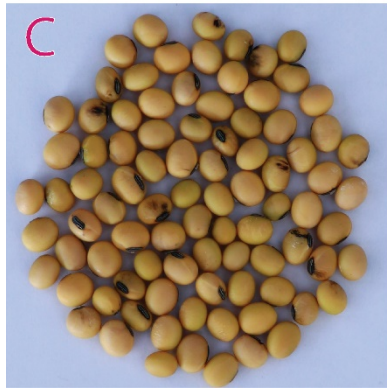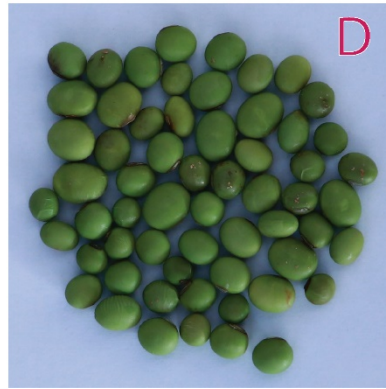

**Figure S1.** Seed samples of black (A); brown (B); yellow (C); and green (D) seed coat colors of soybean seed germplasm accessions.
