# Supplementary material for: Origin, Maturity Group and Seed Coat Color Influence Carotenoid and Chlorophyll Concentrations in Soybean Seeds
Source: MDPI journal article supplement (doi:10.3390/plants11070848), 2022-03-23
Supplement: s1 [file s1]

**Table S4.** Slopes, intercept coefficients and significance of regression equations between 100 seeds dry weight and contents of lutein, zeaxanthin,  $\beta$ -carotene, total carotenoids, chlorophyll-a, chlorophyll-b and total chlorophylls from diversified soybean germplasm accessions with black (n = 41), brown (n = 18), green (n = 18) and yellow (n = 331) seed coat colors

| Seed coat color | Factor    | Carotenoid components |            |                   | Chlorophyll components |               |               |                    |
|-----------------|-----------|-----------------------|------------|-------------------|------------------------|---------------|---------------|--------------------|
|                 |           | Lutein                | Zeaxanthin | $\beta$ -carotene | Total carotenoids      | Chlorophyll-a | Chlorophyll-b | Total chlorophylls |
| Black           | Slope     | -1.0290               | -0.0767    | -0.0173           | -1.1237                | 0.1284        | -0.1281       | -0.0052            |
|                 | Intercept | 30.6140               | 1.6453     | 0.8099            | 32.6806                | 9.6778        | 6.2746        | 15.5823            |
|                 | P-value   | **                    | **         | NS                | **                     | NS            | NS            | NS                 |
| Brown           | Slope     | -0.4959               | -0.0242    | -0.0443           | -0.5896                | -0.3187       | -0.1725       | -0.5042            |
|                 | Intercept | 19.4264               | 1.0398     | 0.8557            | 21.1902                | 9.7090        | 4.6684        | 12.6712            |
|                 | P-value   | NS                    | NS         | *                 | NS                     | NS            | *             | *                  |
| Green           | Slope     | -0.1470               | 0.0267     | -0.0104           | -0.1523                | -0.1397       | -0.0771       | -0.2355            |
|                 | Intercept | 15.8542               | 1.0412     | 0.6565            | 16.2128                | 10.9258       | 4.9030        | 14.9041            |
|                 | P-value   | NS                    | NS         | NS                | NS                     | NS            | NS            | NS                 |
| Yellow          | Slope     | -0.0431               | -0.0034    | -0.0118           | 0.0446                 | 0.1724        | 0.0047        | 0.0350             |
|                 | Intercept | 11.2062               | 0.4965     | 0.6676            | 11.3786                | 0.5532        | 0.8437        | 1.2851             |
|                 | P-value   | NS                    | NS         | NS                | NS                     | **            | NS            | NS                 |

\*, \*\* significant at  $p < 0.05$  and  $p < 0.01$ , respectively; NS, not significant.
