# Supplementary material for: Origin, Maturity Group and Seed Coat Color Influence Carotenoid and Chlorophyll Concentrations in Soybean Seeds
Source: MDPI journal article supplement (doi:10.3390/plants11070848), 2022-03-23
Supplement: s1 [file s1]

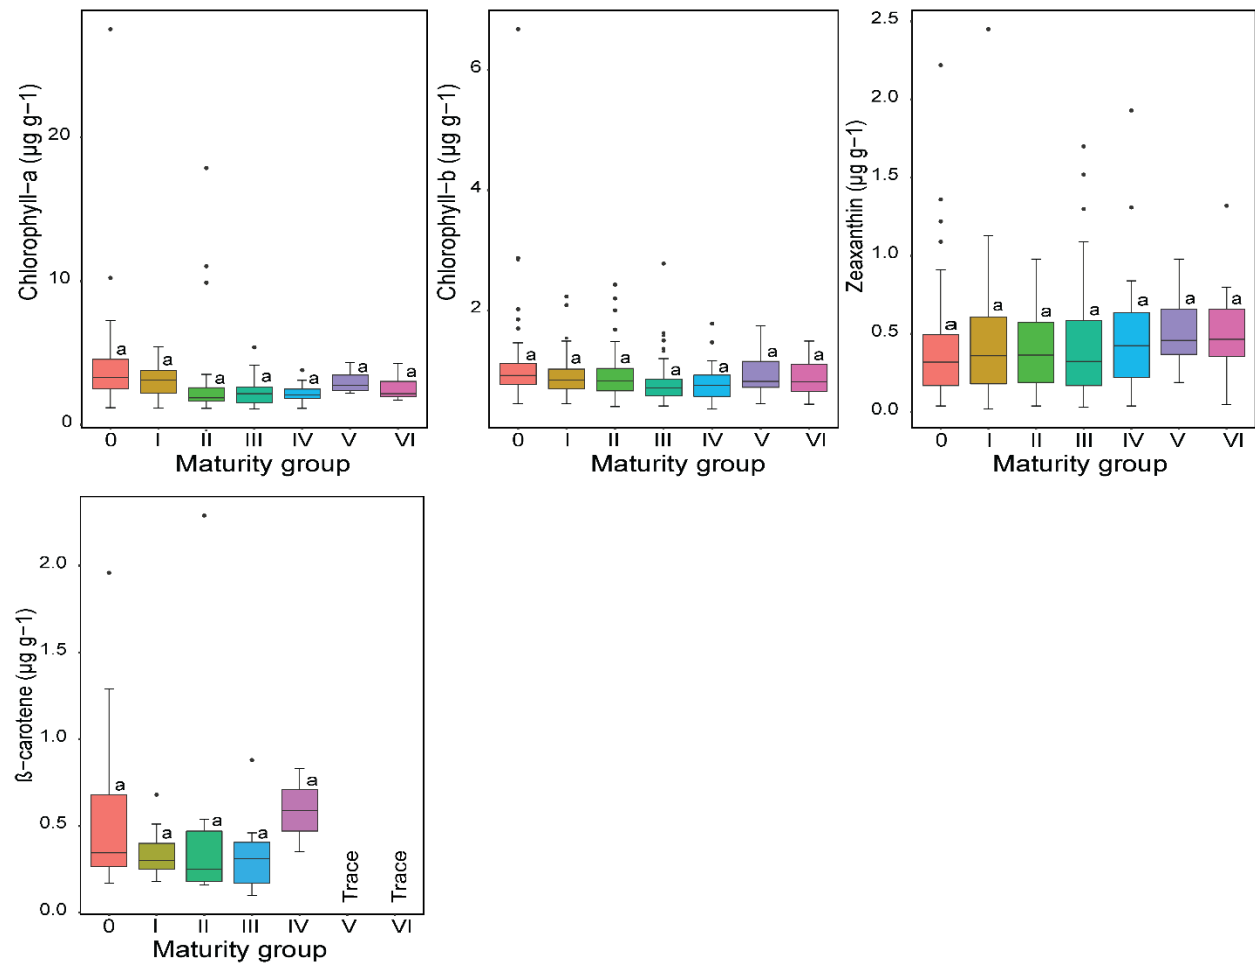

**Figure S3.** The zeaxanthin,  $\beta$ -carotene, chlorophyll-a & -b concentrations of yellow seed coat colored soybean accessions from different maturity groups. Similar lower-case letters indicate that there was non-significant difference ( $p > 0.05$ ) among the maturity groups in each trait.
