# Supplementary material for: Origin, Maturity Group and Seed Coat Color Influence Carotenoid and Chlorophyll Concentrations in Soybean Seeds
Source: MDPI journal article supplement (doi:10.3390/plants11070848), 2022-03-23
Supplement: s1 [file s1]

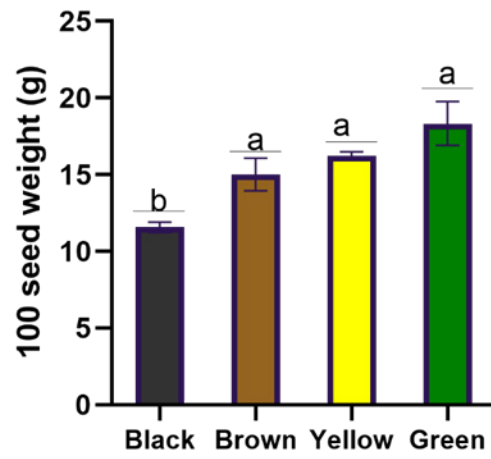

**Figure S2.** The 100 seeds weight of soybean accessions with various seed coat colors. Different lower-case letters indicate statistically significant difference at  $p < 0.05$  level among the seed coat colors
