# Supplementary material for: Origin, Maturity Group and Seed Coat Color Influence Carotenoid and Chlorophyll Concentrations in Soybean Seeds
Source: Plants (Basel). 2022 Mar 23;11(7):848. doi: 10.3390/plants11070848 (PMC9003432; doi:10.3390/plants11070848)
Supplement: Supplementary file 1 [file plants-11-00848-s001.zip]

Archive with 6 entries (6 files):
- Figure S1. Various seed coat colors.pdf
- Figure S2. The 100 Seeds dry weight of colored soybeans.pdf
- Figure S3. Seed carotenoid and chlorophyll concentrations of soybean accessions from different maturity groups.pdf
- Supplementary Table S1. The 408 soybean accessions of various origins along with their seed coat color and maturity group.xlsx
- Supplementary Table S4. Regression analysis.pdf
- Table S2-S3. Weather data at the Experimental Sites in China in 2017 and 2018 Cropping Seasons, and Aanalysis of Variance for Carotenoids and Chlorophyll contents.pdf
