# Supplementary material for: Origin, Maturity Group and Seed Coat Color Influence Carotenoid and Chlorophyll Concentrations in Soybean Seeds
Source: Plants (Basel). 2022 Mar 23;11(7):848. doi: 10.3390/plants11070848 (PMC9003432; doi:10.3390/plants11070848)
Supplement: Supplementary file 1 [file plants-11-00848-s001.zip › Supplementary Table S1. The 408 soybean accessions of various origins along with their seed coat color and maturity group.xlsx]

## Sheet: Table S1
Table S1. The 408 soybean accessions of various origins along with their seed coat color and maturity group
S/N	ID. number	Country	Seed coat color	Maturity group
1	ZDD00023	China	yellow	0
2	ZDD00042	China	yellow	0
3	ZDD00043	China	yellow	0
4	ZDD00250	China	yellow	I
5	ZDD00252	China	yellow	III
6	ZDD00261	China	yellow	I
7	ZDD00332	China	brown	0
8	ZDD00393	China	yellow	I
9	ZDD00651	China	yellow	I
10	ZDD00717	China	black	V
11	ZDD00745	China	yellow	I
12	ZDD01412	China	black	III
13	ZDD06836	China	yellow	0
14	ZDD17668	China	yellow	0
15	ZDD17669	China	yellow	0
16	ZDD17713	China	yellow	0
17	ZDD17882	China	yellow	II
18	ZDD22653	China	yellow	I
19	ZDD22660	China	yellow	0
20	ZDD23221	China	yellow	III
21	ZDD23277	China	yellow	IV
22	ZDD23602	China	yellow	0
23	ZDD23645	China	yellow	I
24	ZDD23684	China	yellow	IV
25	ZDD23704	China	yellow	II
26	ZDD23714	China	yellow	II
27	ZDD23732	China	yellow	0
28	ZDD23858	China	yellow	0
29	ZDD24320	China	yellow	0
30	ZDD24321	China	yellow	0
31	ZDD24324	China	yellow	0
32	ZDD24329	China	yellow	0
33	ZDD24331	China	yellow	0
34	ZDD24336	China	yellow	0
35	ZDD24342	China	yellow	I
36	ZDD24344	China	yellow	I
37	ZDD24345	China	yellow	I
38	ZDD24346	China	yellow	0
39	ZDD24362	China	yellow	0
40	ZDD24374	China	yellow	I
41	ZDD24376	China	yellow	0
42	ZDD24399	China	yellow	I
43	ZDD24406	China	yellow	I
44	ZDD24424	China	yellow	I
45	ZDD24531	China	yellow	IV
46	ZDD24601	China	yellow	0
47	Jiyu108	China	yellow	I
48	Jiyu109	China	yellow	I
49	ZDD24477	China	yellow	II
50	Jilinxiaolidou7	China	yellow	II
51	Jiyu86	China	yellow	II
52	Jiyu404	China	yellow	II
53	Jiyu302	China	yellow	II
54	Jiyu204	China	yellow	I
55	Jimidou2	China	yellow	II
56	Jimidou3	China	yellow	II
57	Dongsheng7	China	yellow	0
58	Zhongkemaodou2	China	brown	I
59	13QS040(S)	China	yellow	0
60	ZDD23829	China	yellow	III
61	ZDD01522	China	black	III
62	ZDD08013	China	black	V
63	ZDD08094	China	black	IV
64	ZDD08101	China	black	V
65	ZDD08160	China	yellow	IV
66	ZDD08213	China	yellow	V
67	ZDD08230	China	green	IV
68	ZDD08237	China	green	V
69	ZDD08705	China	yellow	II
70	ZDD08812	China	yellow	III
71	ZDD08928	China	yellow	III
72	ZDD09581	China	black	VI
73	ZDD10186	China	yellow	III
74	ZDD10217	China	green	III
75	ZDD10222	China	green	III
76	ZDD10248	China	green	VI
77	ZDD10987	China	yellow	I
78	ZDD11091	China	brown	II
79	ZDD18856	China	yellow	III
80	ZDD18887	China	yellow	III
81	ZDD18928	China	yellow	IV
82	ZDD23883	China	yellow	III
83	ZDD23910	China	yellow	II
84	ZDD24022	China	yellow	IV
85	ZDD24063	China	yellow	III
86	ZDD24847	China	yellow	III
87	ZDD01818	China	black	III
88	ZDD01890	China	black	V
89	ZDD03991	China	yellow	VI
90	ZDD08489	China	black	IV
91	ZDD08494	China	black	IV
92	ZDD08537	China	brown	V
93	ZDD09882	China	yellow	III
94	ZDD09929	China	yellow	IV
95	ZDD10734	China	black	VI
96	ZDD11159	China	green	VI
97	ZDD11183	China	brown	V
98	ZDD11192	China	brown	V
99	ZDD19107	China	yellow	III
100	ZDD19144	China	yellow	V
101	ZDD19339	China	yellow	II
102	ZDD19465	China	yellow	VI
103	ZDD19714	China	yellow	IV
104	ZDD06514	China	yellow	II
105	ZDD11569	China	brown	II
106	ZDD12331	China	yellow	IV
107	ZDD12353	China	yellow	IV
108	ZDD12436	China	yellow	III
109	ZDD12463	China	yellow	III
110	ZDD12479	China	yellow	I
111	ZDD12746	China	green	III
112	ZDD12753	China	green	III
113	ZDD12828	China	brown	VI
114	ZDD12832	China	brown	I
115	ZDD12944	China	yellow	IV
116	ZDD13117	China	yellow	IV
117	ZDD13135	China	green	IV
118	ZDD13149	China	green	IV
119	ZDD13152	China	green	III
120	ZDD13840	China	yellow	III
121	ZDD14221	China	yellow	VI
122	ZDD14232	China	yellow	IV
123	ZDD14267	China	brown	II
124	ZDD20666	China	yellow	V
125	ZDD21030	China	yellow	III
126	ZDD21171	China	black	III
127	ZDD21178	China	black	V
128	ZDD21208	China	yellow	III
129	ZDD06361	China	yellow	III
130	ZDD06377	China	brown	III
131	ZDD06595	China	yellow	IV
132	ZDD06638	China	yellow	V
133	ZDD14911	China	yellow	V
134	ZDD14981	China	yellow	IV
135	ZDD15144	China	yellow	IV
136	ZDD24126	China	yellow	III
137	ZDD24145	China	green	III
138	ZDD24157	China	green	IV
139	ZDD24160	China	yellow	III
140	ZDD24823	China	yellow	IV
141	ZDD25115	China	yellow	III
142	ZDD18394	China	black	III
143	Wandou35	China	yellow	V
144	ZDD25258	China	yellow	III
145	ZDD25213	China	yellow	II
146	ZDD04461	China	yellow	IV
147	ZDD05504	China	yellow	V
148	ZDD06763	China	yellow	III
149	ZDD11638	China	yellow	V
150	ZDD12212	China	black	III
151	ZDD12237	China	black	II
152	ZDD13409	China	yellow	VI
153	ZDD13802	China	brown	VI
154	ZDD14319	China	yellow	0
155	ZDD14709	China	green	IV
156	ZDD14729	China	black	III
157	ZDD14731	China	black	IV
158	ZDD14835	China	yellow	III
159	ZDD16052	China	yellow	VI
160	ZDD16617	China	brown	I
161	ZDD20441	China	yellow	IV
162	ZDD22104	China	black	III
163	ZDD23873	China	yellow	II
164	Zhonghuang688	China	yellow	III
165	ZDD23629	China	yellow	0
166	ZDD00603	China	yellow	I
167	ZDD00021	China	yellow	I
168	ZDD02626	China	yellow	III
169	ZDD02764	China	yellow	IV
170	ZDD08352	China	yellow	III
171	ZDD11226	China	yellow	VI
172	ZDD19131	China	yellow	IV
173	ZDD18080	China	yellow	I
174	ZDD09279	China	black	V
175	ZDD18870	China	yellow	V
176	ZDD23040	China	yellow	III
177	ZDD08650	China	yellow	I
178	ZDD22985	China	green	IV
179	ZDD18632	China	yellow	II
180	ZDD00003	China	yellow	I
181	ZDD00041	China	yellow	0
182	ZDD06819	China	yellow	0
183	ZDD22682	China	yellow	0
184	ZDD19381	China	yellow	III
185	ZDD23131	China	yellow	II
186	ZDD23181	China	black	I
187	ZDD03739	China	yellow	III
188	ZDD07088	China	yellow	II
189	ZDD10499	China	yellow	VI
190	ZDD14252	China	black	II
191	ZDD09160	China	green	VI
192	ZDD18878	China	yellow	III
193	ZDD03533	China	brown	V
194	ZDD23089	China	yellow	III
195	ZDD07218	China	yellow	I
196	ZDD02864	China	yellow	V
197	ZDD10100	China	yellow	IV
198	ZDD07489	China	yellow	I
199	ZDD06375	China	black	IV
200	ZDD22793	China	yellow	III
201	ZDD21907	China	green	VI
202	ZDD19105	China	yellow	II
203	ZDD23896	China	yellow	III
204	ZDD23885	China	yellow	III
205	ZDD23615	China	yellow	0
206	ZDD23628	China	yellow	0
207	ZDD23632	China	yellow	0
208	ZDD23633	China	yellow	0
209	ZDD24330	China	yellow	0
210	ZDD24325	China	yellow	0
211	ZDD23620	China	yellow	0
212	ZDD24565	China	yellow	I
213	ZDD18529	China	yellow	I
214	ZDD09160	China	yellow	I
215	ZDD09587	China	yellow	I
216	ZDD18723	China	yellow	I
217	ZDD07409	China	yellow	I
218	ZDD16828	China	yellow	I
219	ZDD16783	China	black	I
220	YZY2004-15-15W83	China	yellow	VI
221	Ls15	China	yellow	II
222	ZDD24332	China	yellow	0
223	ZDD20676	China	yellow	0
224	ZDD02096	China	yellow	0
225	ZDD19027	China	yellow	0
226	ZDD04430	China	yellow	0
227	Z13-653-1	China	yellow	III
228	Z13-630-15	China	yellow	III
229	Z13-628-3	China	yellow	III
230	Z13-631-7	China	yellow	III
231	Z13-633-1	China	yellow	III
232	ZDD14862	China	yellow	III
233	ZDD14935	China	yellow	III
234	ZDD19409	China	yellow	IV
235	ZDD23626	China	yellow	0
236	ZDD24640	China	yellow	III
237	WDD01273	Japan	yellow	0
238	Kariyutaka	Japan	yellow	I
239	WDD01202	Japan	yellow	I
240	WDD01226	Japan	yellow	I
241	WDD02350	Japan	yellow	0
242	WDD01253	Japan	yellow	I
243	WDD01264	Japan	yellow	I
244	WDD01252	Japan	yellow	I
245	WDD01215	Japan	yellow	I
246	WDD01267	Japan	yellow	I
247	WDD00803	Japan	yellow	II
248	WDD02148	Japan	yellow	II
249	WDD02155	Japan	yellow	I
250	WDD02152	Japan	yellow	I
251	WDD02282	Japan	yellow	I
252	WDD02355	Japan	yellow	II
253	WDD02286	Japan	yellow	III
254	WDD02292	Japan	yellow	V
255	WDD02913	Russia	yellow	I
256	WDD02958	Russia	black	I
257	WDD02625	Russia	yellow	III
258	WDD02708	Russia	brown	I
259	WDD02897	Russia	yellow	I
260	WDD02957	Russia	black	I
261	WDD02675	Russia	yellow	0
262	WDD02873	Russia	yellow	II
263	WDD02872	Russia	yellow	II
264	WDD02917	Russia	black	III
265	WDD02880	Russia	brown	III
266	WDD02802	Russia	black	III
267	WDD02920	Russia	green	III
268	WDD02643	Russia	yellow	0
269	WDD02914	Russia	yellow	III
270	WDD02702	Russia	yellow	0
271	WDD02790	Russia	yellow	0
272	WDD02599	Russia	yellow	III
273	WDD02848	Russia	yellow	I
274	WDD02076	USA	yellow	II
275	WDD00511	USA	yellow	I
276	WDD03084	USA	yellow	II
277	WDD01583	USA	yellow	II
278	WDD01708	USA	yellow	II
279	WDD01623	USA	yellow	V
280	WDD03073	USA	yellow	II
281	WDD01622	USA	yellow	V
282	WDD02002	USA	yellow	II
283	WDD01559	USA	yellow	I
284	WDD01619	USA	yellow	V
285	WDD01630	USA	yellow	V
286	WDD00721	USA	yellow	V
287	WDD00180	USA	yellow	II
288	WDD01626	USA	yellow	V
289	WDD01574	USA	yellow	II
290	WDD01627	USA	yellow	V
291	WDD00186	USA	yellow	II
292	WDD00532	USA	yellow	II
293	WDD01572	USA	yellow	II
294	WDD00626	USA	yellow	I
295	WDD01674	USA	brown	III
296	WDD00429	USA	yellow	II
297	WDD00530	USA	yellow	II
298	WDD02995	USA	black	0
299	WDD00558	USA	yellow	II
300	WDD00340	USA	yellow	II
301	WDD01579	USA	yellow	II
302	WDD00524	USA	yellow	0
303	WDD00176	USA	yellow	II
304	WDD01839	USA	yellow	IV
305	WDD01645	USA	yellow	VI
306	WDD00167	USA	yellow	II
307	WDD01648	USA	yellow	VI
308	WDD01486	USA	yellow	II
309	WDD00536	USA	yellow	II
310	WDD01487	USA	yellow	II
311	WDD02040	USA	yellow	III
312	WDD01632	USA	yellow	VI
313	WDD01594	USA	yellow	III
314	WDD01643	USA	yellow	VI
315	WDD01554	USA	yellow	0
316	WDD00033	USA	yellow	II
317	WDD03005	USA	yellow	III
318	WDD03001	USA	yellow	III
319	WDD02015	USA	yellow	0
320	WDD03003	USA	yellow	III
321	WDD03006	USA	yellow	III
322	WDD01613	USA	yellow	IV
323	WDD00410	USA	brown	III
324	WDD00528	USA	yellow	II
325	WDD00623	USA	yellow	IV
326	WDD03039	USA	yellow	V
327	WDD00504	USA	yellow	0
328	WDD03025	USA	yellow	0
329	WDD03052	USA	yellow	III
330	WDD01599	USA	yellow	III
331	WDD00341	USA	yellow	III
332	WDD01857	USA	yellow	III
333	WDD02989	USA	black	0
334	WDD01506	USA	yellow	III
335	WDD00698	USA	yellow	V
336	WDD00573	USA	yellow	III
337	WDD00287	USA	yellow	III
338	WDD02003	USA	yellow	III
339	WDD01991	USA	yellow	III
340	WDD01607	USA	yellow	IV
341	WDD01511	USA	yellow	III
342	WDD01513	USA	yellow	III
343	WDD01503	USA	yellow	III
344	WDD00949	USA	yellow	III
345	WDD00649	USA	yellow	II
346	WDD00152	USA	yellow	IV
347	WDD00586	USA	yellow	III
348	WDD00587	USA	yellow	III
349	WDD01945	USA	yellow	III
350	WDD00585	USA	yellow	III
351	WDD02102	USA	black	III
352	WDD01996	USA	yellow	III
353	WDD00007	USA	yellow	IV
354	WDD00596	USA	yellow	IV
355	WDD00329	USA	yellow	II
356	WDD01707	USA	yellow	0
357	WDD00017	USA	yellow	IV
358	WDD01470	USA	yellow	III
359	WDD00257	USA	black	III
360	WDD01944	USA	yellow	IV
361	PI438498	USA	black	IV
362	PI494182	USA	yellow	0
363	PI200495	USA	black	IV
364	PI43848913	USA	black	IV
365	PI437090	USA	yellow	0
366	WDD02117	USA	yellow	0
367	WDD01975	USA	yellow	0
368	WDD03036	USA	yellow	0
369	WDD02109	USA	yellow	0
370	NO 11	USA	yellow	I
371	WDD02262	USA	yellow	I
372	WDD01577	USA	yellow	II
373	WDD01974	USA	yellow	II
374	WDD01871	USA	yellow	II
375	WDD01948	USA	yellow	III
376	WDD00590	USA	yellow	III
377	NO 23	USA	yellow	III
378	NO 24	USA	yellow	IV
379	WDD01608	USA	yellow	IV
380	WDD02263	USA	yellow	IV
381	WDD03045	USA	yellow	V
382	WDD00569	USA	yellow	III
383	WDD00602	USA	yellow	IV
384	WDD00467	USA	black	V
385	WDD00472	USA	black	VI
386	WDD03019	USA	yellow	V
387	WDD00640	USA	yellow	IV
388	WDD00476	USA	black	IV
389	WDD00475	USA	black	IV
390	WDD00289	USA	black	IV
391	WDD01947	USA	yellow	V
392	WDD02225	USA	yellow	I
393	Charleston	USA	yellow	III
394	WDD02019	USA	yellow	0
395	WDD03092	USA	yellow	III
396	WDD03008	USA	yellow	II
397	WDD01715	USA	yellow	III
398	WDD00628	USA	yellow	I
399	WDD00405	USA	yellow	II
400	WDD02114	USA	yellow	0
401	WDD02238	USA	yellow	I
402	WDD01614	USA	yellow	V
403	NO 33	USA	yellow	VI
404	NO 34	USA	yellow	VI
405	WDD03016	USA	yellow	VI
406	WDD02107	USA	yellow	I
407	WDD02075	USA	yellow	II
408	WDD03116	USA	yellow	I
